# Supplementary material
Source: Springer Nature journal article supplement (https://www.springermedizin.de/resource/supplementary/13075_2010_3027_MOESM3_ESM.pdf/9693368)

(a)

C57BL/6

u-PA<sup>-/-</sup>

Wk 0

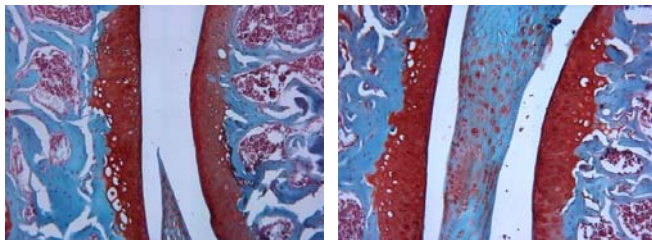

Wk 1

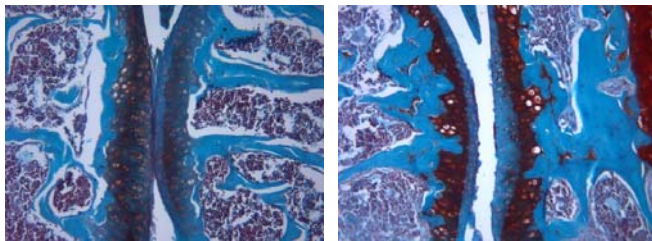

Wk 2

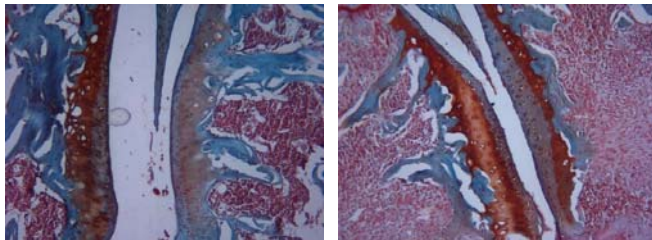

Wk 6

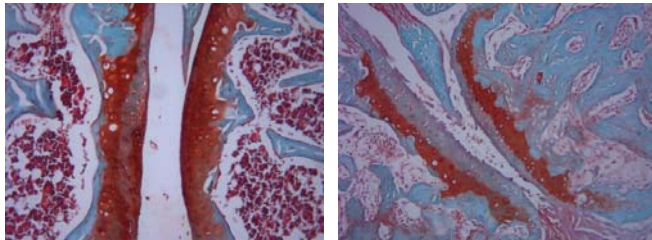

(b)

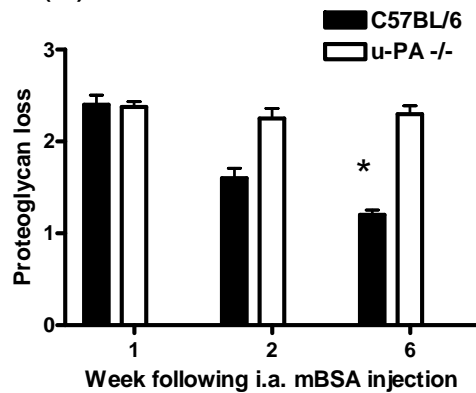

Supplement: MOESM3 [file 9693368]
